# Supplementary material for: Boosting visible light photo-/Fenton-catalytic synergetic activity of BiOIO3 by coupling with Fe2O3
Source: Royal Society of Chemistry journal article supplement (doi:10.1039/c7ra02761c), 2017-01-01
Supplement: c7ra02761c1.pdf [file c7ra02761c1.pdf]

## Supporting information

### Boosting visible light photo-/Fenton-catalytic synergetic activity of BiOIO<sub>3</sub> by coupling with Fe<sub>2</sub>O<sub>3</sub>

Hehua Zeng<sup>a\*</sup>, Xiu Liu<sup>a</sup>, Ting Wei<sup>a</sup>, Xueqin Li<sup>a</sup>, Tianxiang Liu<sup>a</sup>, Xuemei Min<sup>a</sup>, Qihui Zhu<sup>a</sup>, Xiufeng Zhao<sup>a</sup>, Jianhui Li<sup>a,b\*</sup>

<sup>a</sup> Department of Chemistry and Applied Chemistry, Changji University, Changji 831100, Xinjiang, China.

<sup>b</sup> National Engineering Laboratory for Green Chemical Productions of Alcohols-Ethers-Esters, College of Chemistry and Chemical Engineering, Xiamen University, Xiamen 361005, Fujian, China.

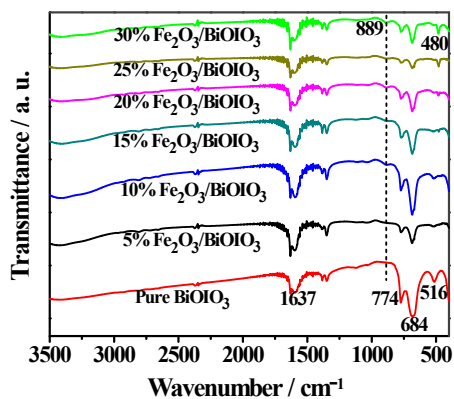

Figure S1. FT-IR spectra of pure BiOIO<sub>3</sub> and x% Fe<sub>2</sub>O<sub>3</sub>/BiOIO<sub>3</sub>.

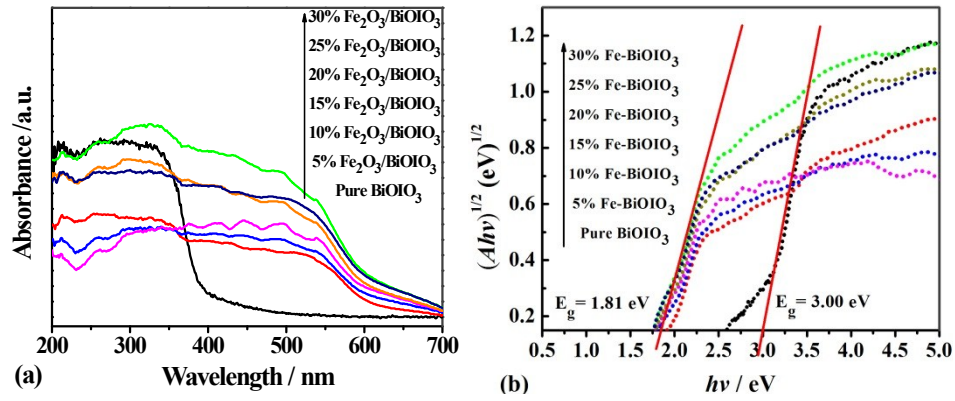

**Figure S2.** (a) UV-vis absorption spectra and (b) band gaps of pure BiOIO<sub>3</sub> and x% Fe<sub>2</sub>O<sub>3</sub>/BiOIO<sub>3</sub>.

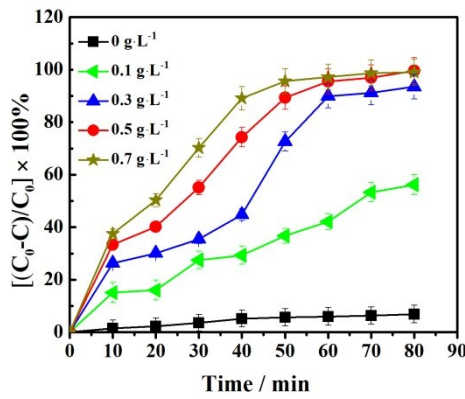

**Figure S3.** Catalyst dosage

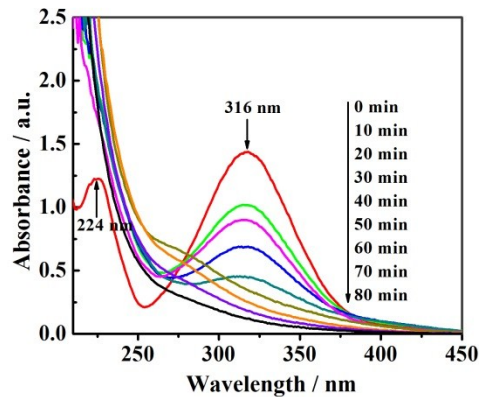

**Figure S4.** The absorption variation of PNP over the 15% Fe<sub>2</sub>O<sub>3</sub>/BiOIO<sub>3</sub>.

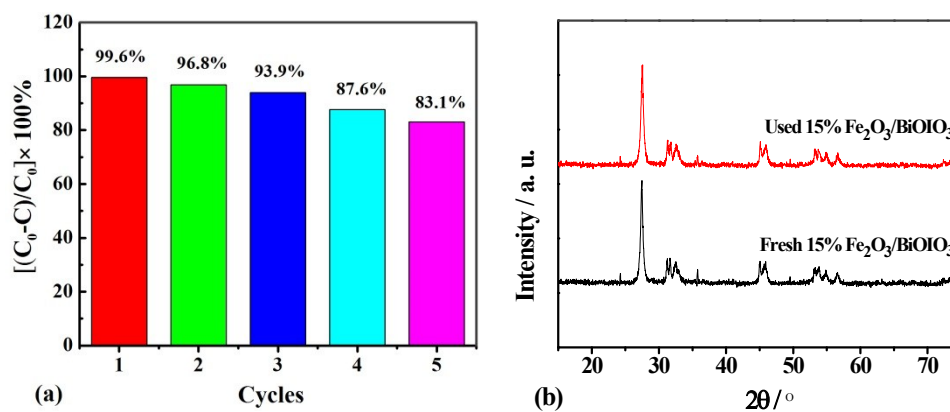

**Figure S5.** (a) Recycling tests of 15% Fe<sub>2</sub>O<sub>3</sub>/BiOIO<sub>3</sub> under irradiation and (b) the XRD patterns of 15% Fe<sub>2</sub>O<sub>3</sub>/BiOIO<sub>3</sub> before and after irradiation.

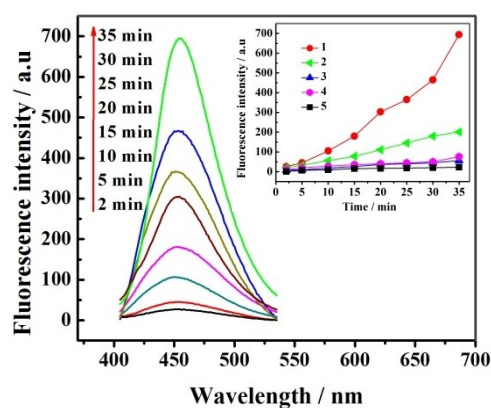

**Figure S6.** Emission spectra of the solution in 15% Fe<sub>2</sub>O<sub>3</sub>/BiOIO<sub>3</sub>/H<sub>2</sub>O<sub>2</sub>/coumarin system, the inset shows the reaction time dependence of the emission intensity in the systems of: (1) 15% Fe<sub>2</sub>O<sub>3</sub>/BiOIO<sub>3</sub>/H<sub>2</sub>O<sub>2</sub>/coumarin, (2) 15% Fe<sub>2</sub>O<sub>3</sub>/BiOIO<sub>3</sub>/H<sub>2</sub>O<sub>2</sub>/coumarin-in dark, (3) 15% Fe<sub>2</sub>O<sub>3</sub>/BiOIO<sub>3</sub>/coumarin, (4) H<sub>2</sub>O<sub>2</sub>/coumarin, (5) 15% Fe<sub>2</sub>O<sub>3</sub>/BiOIO<sub>3</sub>/H<sub>2</sub>O<sub>2</sub>/coumarin-IPA. (Excited at 346 nm, and detected at 456 nm).
